# Supplementary material for: Eu3+ local site analysis and emission characteristics of novel Nd2Zr2O7:Eu phosphor: insight into the effect of europium concentration on its photoluminescence properties
Source: Royal Society of Chemistry journal article supplement (doi:10.1039/c6ra11698a), 2016-01-01
Supplement: c6ra11698a1.pdf [file c6ra11698a1.pdf]

## Eu<sup>3+</sup> Local Site Analysis and Emission Characteristics of Novel Nd<sub>2</sub>Zr<sub>2</sub>O<sub>7</sub>:Eu phosphor- An Insight into the Effect of Europium Concentration on its Photoluminescence Properties

Santosh K. Gupta<sup>a\*</sup>, C. Reghukumar<sup>b</sup>, R.M. Kadam<sup>a</sup>

a. Radiochemistry Division, Bhabha Atomic Research Centre Trombay, Mumbai-400085, India

b. Institute of science education and research Centre, Santiniketan, West Bengal -731235, India

\*Corresponding Author- [santoshg@barc.gov.in](mailto:santoshg@barc.gov.in), [santufnd@gmail.com](mailto:santufnd@gmail.com)

Telephone- +91-22-25590636

Fax- +91-22-25505151

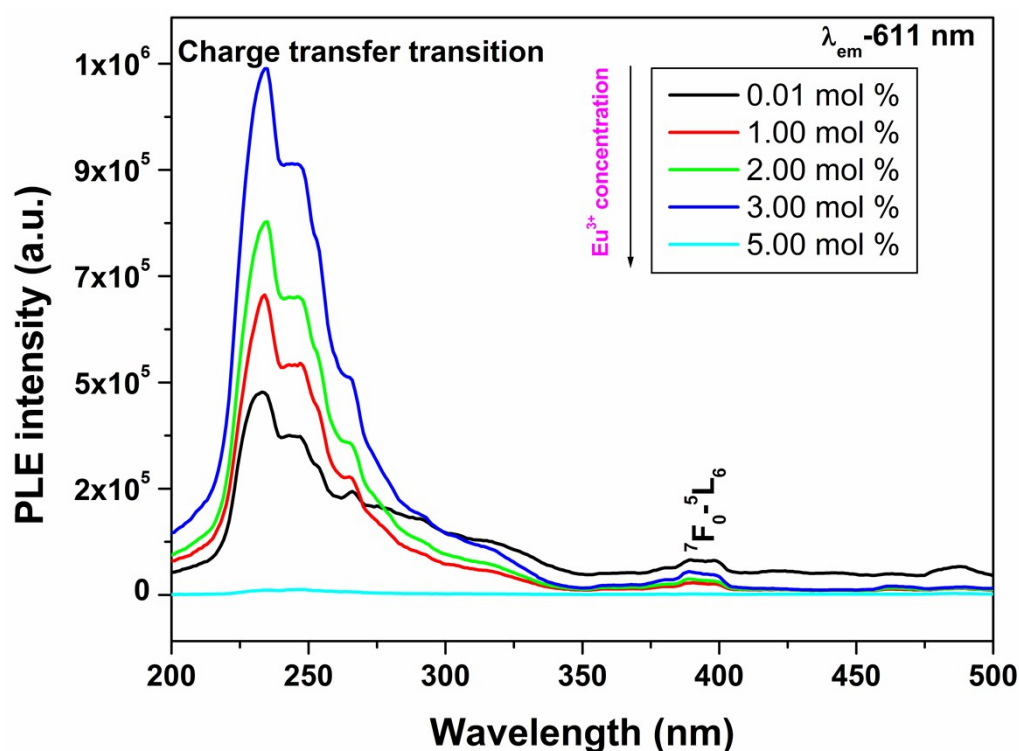

Figure S1: Effect of europium ion concentration on excitation spectra of Nd<sub>2</sub>Zr<sub>2</sub>O<sub>7</sub>: Eu<sup>3+</sup>

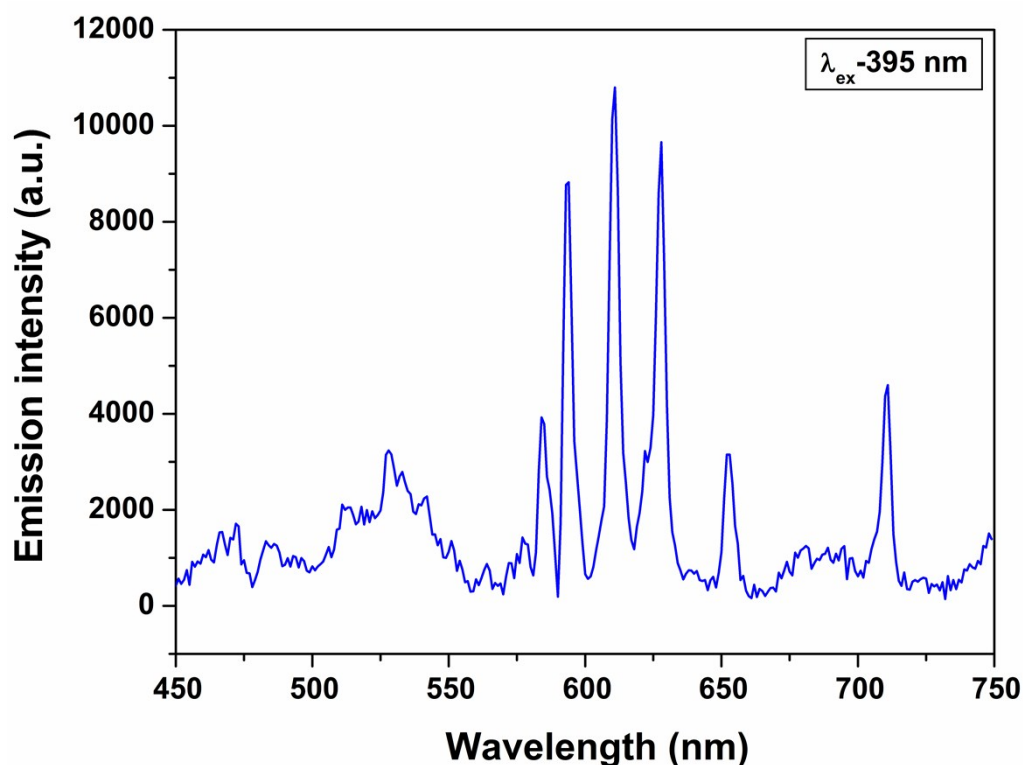

**Figure S2: Emission spectrum of Nd<sub>2</sub>Zr<sub>2</sub>O<sub>7</sub>: Eu<sup>3+</sup> (0.01 %) under 395 nm excitation**

### **I-1: Procedure data slicing in TRES**

- ❖ Supposing there are two components A (short lived) and B (long lived), first we record the composite spectrum (A+B) with very short delay (just to avoid the lamp profile).
- ❖ Then give sufficient delay and record with identical integration times so that there is only B component in the spectrum (let's say B'; A is already decayed).
- ❖ But the intensity of the B' which we would get is not the same as the original B in the composite spectrum (A+B).
- ❖ So we multiply a suitable multiplying factor (exp factor,  $e^{-t/\tau}$ ) so as to get the original intensity of B.
- ❖ Then if we subtract this B from the composite spectrum (A+B), it is possible to get the short lived component A.
- ❖ One has to maintain however same gate widths while dealing with this type of procedure.

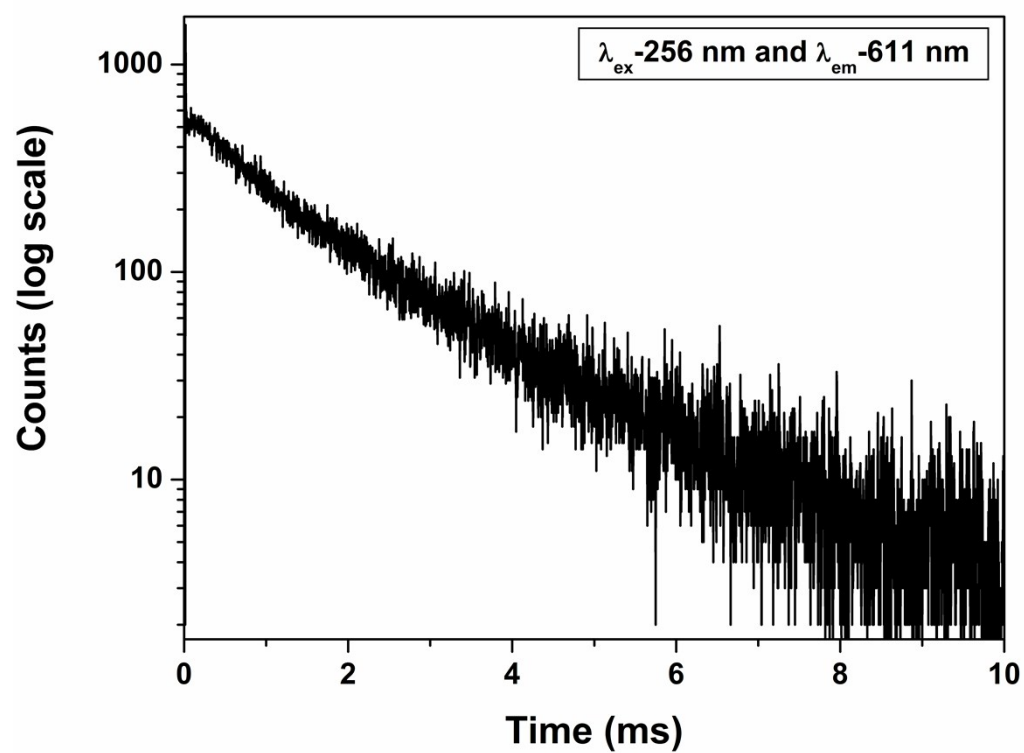

**Figure S3: Lifetime decay profile  $\text{Nd}_2\text{Zr}_2\text{O}_7: \text{Eu}^{3+}$  (5.0 %) under 256 nm excitation and 611 nm emission.**
